# Supplementary material for: Diversity and Distribution of the Benthic Foraminifera on the Brunei Shelf (Northwest Borneo): Effect of Seawater Depth
Source: MDPI journal article supplement (doi:10.3390/d15080937), 2023-08-18
Supplement: s1 [file s1]

Supplementary Table S1. Benthic foraminiferal species of MES.

| Species                                                              | MES<br>1 | ME<br>S 5 | ME<br>S 8 | ME<br>S 15 | ME<br>S 16 | MES<br>17 | ME<br>S 22 | ME<br>S 24 | MES<br>25 | ME<br>S 27 | ME<br>S 29 |
|----------------------------------------------------------------------|----------|-----------|-----------|------------|------------|-----------|------------|------------|-----------|------------|------------|
| <i>Bigenerina</i> sp.                                                | 0        | 0         | 0         | 0          | 1          | 0         | 1          | 1          | 0         | 0          | 0          |
| <i>Bigenerina agglutinans</i> d'Orbigny, 1846                        | 0        | 1         | 0         | 0          | 0          | 0         | 0          | 1          | 0         | 0          | 0          |
| <i>Bigenerina</i> cf. <i>agglutinans</i> ?                           | 1        | 0         | 1         | 0          | 0          | 0         | 0          | 1          | 0         | 0          | 0          |
| <i>Bigenerina nodosaria</i> d'Orbigny, 1826                          | 0        | 0         | 0         | 1          | 1          | 0         | 1          | 1          | 1         | 1          | 0          |
| <i>Cibicides lobatulus</i> (Cushman, 1910)                           | 0        | 0         | 0         | 0          | 0          | 0         | 0          | 1          | 0         | 0          | 0          |
| <i>Cyclammina subtrullissata</i> (Parr, 1950)                        | 0        | 0         | 0         | 0          | 0          | 0         | 0          | 1          | 0         | 0          | 0          |
| <i>Cyclammina trullissata</i> (Brady, 1879)                          | 0        | 0         | 0         | 0          | 0          | 0         | 0          | 1          | 0         | 0          | 0          |
| <i>Cylindroclavulina</i> sp.                                         | 0        | 0         | 0         | 0          | 0          | 0         | 0          | 1          | 0         | 0          | 0          |
| <i>Reophax</i> cf. <i>agglutinans</i> Cushman, 1913                  | 0        | 1         | 0         | 0          | 0          | 0         | 0          | 0          | 0         | 0          | 0          |
| <i>Reophax communis</i> Lacroix, 1930                                | 1        | 1         | 1         | 0          | 0          | 0         | 0          | 0          | 0         | 0          | 0          |
| <i>Reophax scorpiurus</i> Montfort, 1808                             | 0        | 0         | 0         | 0          | 0          | 0         | 1          | 1          | 0         | 0          | 0          |
| <i>Rhizammina algaeformis</i> Brady, 1879                            | 0        | 0         | 0         | 0          | 0          | 0         | 0          | 1          | 0         | 0          | 0          |
| <i>Spiroplectinella</i> sp. (Goeting et al., 2021)                   | 0        | 0         | 0         | 0          | 0          | 0         | 0          | 1          | 0         | 0          | 0          |
| <i>Textularia</i> cf. <i>agglutinans</i> d'Orbigny, 1839             | 1        | 1         | 1         | 0          | 0          | 0         | 1          | 0          | 0         | 0          | 0          |
| <i>Textularia accidentalis</i> Cushman, 1922                         | 0        | 0         | 0         | 0          | 0          | 0         | 0          | 1          | 0         | 0          | 0          |
| <i>Textularia goessi</i> Cushman, 1911                               | 0        | 0         | 0         | 0          | 0          | 0         | 0          | 0          | 0         | 0          | 1          |
| <i>Textularia lateralis</i> Lalicker, 1935                           | 0        | 1         | 0         | 0          | 0          | 0         | 0          | 0          | 0         | 0          | 0          |
| <i>Textularia porrecta</i> Brady, 1884                               | 0        | 0         | 0         | 0          | 0          | 0         | 0          | 1          | 0         | 0          | 0          |
| <i>Textularia pseudogramen</i> Chapman & Parr, 1937                  | 0        | 0         | 0         | 0          | 0          | 0         | 1          | 0          | 0         | 0          | 0          |
| <i>Textularia stricta</i> Cushman, 1911                              | 0        | 0         | 0         | 0          | 0          | 0         | 0          | 1          | 0         | 0          | 0          |
| <i>Tritaxilina caperata</i> (Brady, 1881)                            | 0        | 0         | 0         | 0          | 0          | 0         | 0          | 1          | 0         | 0          | 1          |
| <i>Adelosina laevigata</i> d'Orbigny, 1826                           | 0        | 1         | 0         | 0          | 0          | 0         | 0          | 0          | 0         | 1          | 0          |
| <i>Adelosina</i> sp. 4 (Goeting et al., 2021)                        | 0        | 0         | 1         | 0          | 0          | 0         | 0          | 0          | 0         | 0          | 0          |
| <i>Alveolinella quoyi</i> (d'Orbigny, 1826)                          | 0        | 1         | 0         | 0          | 0          | 0         | 0          | 0          | 0         | 1          | 0          |
| <i>Ammomassilina alveoliniformis</i> (Millett, 1898)                 | 1        | 1         | 0         | 0          | 0          | 0         | 0          | 0          | 0         | 0          | 0          |
| <i>Cycloforina granulocostata</i> (Germeraad, 1946)                  | 1        | 1         | 0         | 0          | 0          | 0         | 0          | 0          | 0         | 0          | 0          |
| <i>Dendritina Zhengae</i> Ujiié in Hatta & Ujiié, 1992               | 1        | 1         | 1         | 0          | 0          | 0         | 0          | 0          | 1         | 0          | 0          |
| <i>Flintina</i> ( <i>Triloculina</i> ) <i>bradyana</i> Cushman, 1921 | 0        | 0         | 1         | 0          | 0          | 0         | 0          | 0          | 0         | 0          | 0          |
| <i>Lachlanella</i> sp.                                               | 0        | 0         | 0         | 0          | 0          | 0         | 0          | 0          | 1         | 0          | 0          |
| <i>Massilina</i> ? sp. (Goeting et al., 2021)                        | 1        | 1         | 1         | 0          | 0          | 0         | 0          | 0          | 0         | 0          | 0          |
| Miliolid genus 1 (Goeting et al., 2021)                              | 0        | 1         | 1         | 1          | 1          | 0         | 0          | 0          | 0         | 0          | 0          |
| <i>Parasorites orbitolitoides</i> (Hofker, 1930)                     | 0        | 1         | 0         | 0          | 0          | 0         | 0          | 0          | 0         | 0          | 0          |
| <i>Peneroplis planatus</i> (Fichtel & Moll, 1798)                    | 1        | 1         | 0         | 0          | 0          | 0         | 0          | 0          | 0         | 0          | 0          |
| <i>Planispirinella exigua</i> (Brady, 1879) or sp. (Debenay, 2012)   | 0        | 1         | 0         | 0          | 0          | 0         | 0          | 0          | 0         | 0          | 0          |
| <i>Pseudohauerina orientalis</i> (Cushman, 1946)                     | 1        | 1         | 0         | 0          | 0          | 0         | 0          | 0          | 0         | 0          | 0          |
| <i>Pseudomassilina</i> sp. 3 (Goeting et al., 2021)                  | 0        | 0         | 1         | 0          | 0          | 0         | 0          | 0          | 0         | 0          | 0          |
| <i>Pyrgo sarsi</i> (Schlumberger, 1891)                              | 0        | 0         | 1         | 1          | 0          | 1         | 0          | 1          | 1         | 1          | 0          |
| <i>Pyrgo vespertilio</i> (Schlumberger, 1891)                        | 0        | 0         | 0         | 0          | 0          | 0         | 0          | 1          | 0         | 0          | 0          |
| <i>Quinqueloculina cuvieriana</i> d'Orbigny 1839                     | 1        | 1         | 1         | 0          | 0          | 0         | 0          | 1          | 0         | 1          | 0          |
| <i>Quinqueloculina</i> cf. <i>bicarinata</i> d'Orbigny, 1826         | 0        | 0         | 0         | 0          | 0          | 0         | 0          | 0          | 1         | 0          | 0          |
| <i>Quinqueloculina</i> cf. <i>patagonica</i> d'Orbigny, 1839         | 0        | 0         | 0         | 0          | 0          | 0         | 0          | 1          | 0         | 0          | 0          |
| <i>Quinqueloculina granulocostata</i> Germeraad, 1946                | 0        | 0         | 0         | 0          | 0          | 0         | 1          | 1          | 1         | 1          |            |
| <i>Quinqueloculina parkeri</i> (Brady, 1881)                         | 1        | 1         | 1         | 0          | 0          | 0         | 0          | 0          | 0         | 0          | 0          |
| <i>Quinqueloculina</i> sp. 2                                         | 0        | 1         | 1         | 0          | 0          | 1         | 0          | 1          | 0         | 0          | 0          |
| <i>Quinqueloculina</i> sp. 1 (Goeting et al., 2021)                  | 0        | 0         | 0         | 1          | 1          | 1         | 0          | 1          | 1         | 1          | 0          |

|                                                                                                                    |   |   |   |   |   |   |   |   |   |   |   |
|--------------------------------------------------------------------------------------------------------------------|---|---|---|---|---|---|---|---|---|---|---|
| <i>Quinqueloculina</i> sp. 3 (Goeting et al., 2021)                                                                | 0 | 1 | 1 | 0 | 0 | 1 | 0 | 0 | 1 | 0 | 0 |
| <i>Quinqueloculina</i> sp. 6 (Goeting et al., 2021)                                                                | 0 | 1 | 1 | 0 | 0 | 0 | 0 | 1 | 0 | 0 | 0 |
| <i>Quiqueloculina philippinensis</i> Cushman, 1921                                                                 | 1 | 1 | 1 | 0 | 0 | 0 | 0 | 1 | 1 | 1 | 0 |
| <i>Quinqueloculina auberiana</i> d'Orbigny, 1839                                                                   | 0 | 0 | 1 | 0 | 1 | 1 | 0 | 1 | 1 | 1 | 0 |
| <i>Siphonaperta hallocki</i> Förderer & Langer 2016                                                                | 0 | 0 | 1 | 0 | 0 | 0 | 0 | 0 | 0 | 0 | 0 |
| <i>Siphonaperta subagglutinata</i> (Asano, 1936)                                                                   | 0 | 1 | 1 | 0 | 0 | 0 | 1 | 1 | 1 | 1 | 0 |
| <i>Spiroloculina</i> cf. <i>scrobiculata</i> Cushman, 1921                                                         | 1 | 0 | 0 | 0 | 0 | 0 | 0 | 0 | 0 | 0 | 0 |
| <i>Spiroloculina communis</i> Cushman & Todd, 1944                                                                 | 1 | 0 | 1 | 0 | 0 | 0 | 0 | 1 | 1 | 0 | 0 |
| <i>Spiroloculina concava</i> Petri, 1954                                                                           | 0 | 0 | 1 | 0 | 0 | 0 | 0 | 0 | 0 | 0 | 0 |
| <i>Spiroloculina</i> sp. 1                                                                                         | 0 | 1 | 0 | 0 | 0 | 0 | 0 | 0 | 0 | 0 | 0 |
| <i>Spiroloculina subimpressa</i> Parr, 1950                                                                        | 0 | 1 | 0 | 1 | 0 | 0 | 1 | 1 | 1 | 1 | 0 |
| <i>Triloculina tricarinata</i> d'Orbigny, 1826                                                                     | 0 | 1 | 0 | 1 | 0 | 0 | 0 | 1 | 0 | 0 | 0 |
| <i>Triloculina vespertilio</i> Zheng, 1988                                                                         | 0 | 0 | 0 | 0 | 0 | 0 | 0 | 1 | 0 | 0 | 0 |
| <i>Amphicoryna sublineata</i> (Brady, 1884)                                                                        | 0 | 0 | 0 | 0 | 0 | 0 | 0 | 1 | 0 | 1 | 0 |
| <i>Dentalina</i> sp. 1                                                                                             | 0 | 0 | 0 | 0 | 0 | 1 | 0 | 1 | 0 | 1 | 0 |
| <i>Dentalina</i> sp. 2                                                                                             | 0 | 0 | 0 | 0 | 0 | 1 | 0 | 1 | 0 | 1 | 0 |
| <i>Dentalina catenulata</i> (Brady, 1884)                                                                          | 0 | 0 | 0 | 1 | 1 | 0 | 0 | 0 | 0 | 0 | 0 |
| <i>Dentalina vertebralis</i> (Batsch, 1791)                                                                        | 0 | 1 | 0 | 0 | 0 | 1 | 1 | 1 | 1 | 1 | 0 |
| <i>Laevidentalina californica</i> (Cushman & Gray, 1946)                                                           | 0 | 0 | 0 | 0 | 0 | 0 | 0 | 1 | 0 | 0 | 0 |
| <i>Lagena spicata</i> Cushman & McCulloch, 1950                                                                    | 0 | 0 | 0 | 0 | 0 | 0 | 1 | 0 | 0 | 0 | 0 |
| <i>Lagena</i> sp.                                                                                                  | 0 | 0 | 0 | 0 | 0 | 0 | 0 | 0 | 0 | 1 | 0 |
| <i>Lenticulina bradyi</i> (Cushman, 1921)                                                                          | 0 | 0 | 0 | 1 | 0 | 1 | 1 | 1 | 1 | 1 | 0 |
| <i>Lenticulina echinata</i> (d'Orbigny, 1846)                                                                      | 0 | 0 | 0 | 0 | 0 | 0 | 1 | 1 | 1 | 1 | 1 |
| <i>Lenticulina limbosa</i> (Reuss, 1863)                                                                           | 0 | 0 | 1 | 0 | 1 | 0 | 0 | 1 | 0 | 1 | 1 |
| <i>Lenticulina vortex</i> (Fichtel & Moll, 1798)                                                                   | 0 | 0 | 0 | 0 | 0 | 0 | 0 | 1 | 1 | 1 | 0 |
| <i>Marginulinopsis philippinensis</i> (Cushman, 1921)                                                              | 0 | 0 | 0 | 0 | 0 | 0 | 1 | 1 | 0 | 1 | 0 |
| <i>Nodosaria pyrula</i> (Pfleger and Parker, 1951)                                                                 | 0 | 0 | 0 | 0 | 0 | 0 | 1 | 1 | 0 | 0 | 0 |
| <i>Oolina</i> sp. 1                                                                                                | 0 | 0 | 0 | 0 | 0 | 0 | 0 | 0 | 1 | 0 | 0 |
| <i>Planularia gemmata</i> (Brady, 1881)                                                                            | 0 | 0 | 0 | 0 | 0 | 0 | 1 | 1 | 1 | 1 | 0 |
| <i>Lagena annulatacollare?</i> (Loeblich and Tappan, 1994)                                                         | 0 | 0 | 0 | 0 | 0 | 0 | 0 | 1 | 0 | 1 | 0 |
| <i>Pyramidulina catesbyi</i> (d'Orbigny, 1839)                                                                     | 0 | 0 | 0 | 0 | 0 | 1 | 0 | 0 | 0 | 0 | 0 |
| <i>Pyramidulina obliquatus</i> (Parker, 2009)                                                                      | 0 | 0 | 0 | 0 | 0 | 0 | 0 | 1 | 0 | 0 | 0 |
| <i>Pyramidulina</i> sp. 1                                                                                          | 0 | 0 | 0 | 0 | 0 | 0 | 0 | 1 | 1 | 1 | 0 |
| <i>Saracenaria angularis</i> Natland, 1938                                                                         | 0 | 0 | 0 | 0 | 0 | 0 | 1 | 1 | 0 | 1 | 0 |
| <i>Spincterules compressus</i> (Loeblich and Tappan, 1994)                                                         | 0 | 0 | 0 | 0 | 0 | 0 | 0 | 1 | 0 | 1 | 0 |
| <i>Amphistegina papillosa</i> Said, 1949                                                                           | 1 | 1 | 0 | 0 | 0 | 0 | 0 | 0 | 0 | 0 | 0 |
| <i>Asterorotalia pulchella</i> (d'Orbigny, 1839)                                                                   | 1 | 0 | 1 | 0 | 0 | 0 | 0 | 1 | 1 | 0 | 0 |
| <i>Calcarina defrancei</i> d'Orbigny, 1826                                                                         | 0 | 0 | 1 | 0 | 0 | 0 | 0 | 0 | 0 | 0 | 0 |
| <i>Cibicidoides subhaidingerii</i> (Parr, 1950)                                                                    | 0 | 0 | 0 | 0 | 0 | 0 | 1 | 1 | 0 | 1 | 1 |
| <i>Elphidium craticulatum</i> (Fichtel & Moll, 1798)                                                               | 1 | 1 | 1 | 0 | 0 | 0 | 0 | 1 | 1 | 1 |   |
| <i>Uvigerina schwageri</i> Brady, 1884                                                                             | 0 | 0 | 0 | 0 | 0 | 0 | 1 | 1 | 0 | 1 | 1 |
| <i>Heterolepa praecincta</i> (Karrer, 1868)                                                                        | 0 | 0 | 1 | 1 | 0 | 0 | 1 | 1 | 1 | 1 | 0 |
| <i>Neoponides bradyi</i> (Le Calvez, 1974)                                                                         | 0 | 0 | 1 | 0 | 1 | 0 | 0 | 1 | 0 | 0 | 0 |
| <i>Operculina ammonoides</i> (Gronovius, 1781) ( <i>Neoassilina ammonoides</i> (Gronovius, 1781))                  | 1 | 1 | 1 | 1 | 0 | 1 | 1 | 1 | 1 | 1 | 0 |
| <i>Operculina complanata</i> (Defrance in Blainville, 1822) ( <i>Operculina complanata</i> (Holzmann et al. 2022)) | 0 | 1 | 0 | 0 | 0 | 1 | 0 | 1 | 1 | 1 | 0 |
| <i>Operculina discoidalis</i> (d'Orbigny, 1832) ( <i>Neoassilina discoidalis</i> (Holzmann et al. 2022))           | 1 | 1 | 0 | 0 | 1 | 1 | 1 | 1 | 1 | 1 | 0 |
| <i>Paracibicides edomica</i> (Forderer and Langer, 2018)                                                           | 0 | 0 | 0 | 0 | 0 | 0 | 0 | 1 | 0 | 1 | 1 |
| <i>Poroeponides lateralis</i> (Terquem, 1878)                                                                      | 0 | 0 | 0 | 1 | 0 | 0 | 0 | 1 | 0 | 0 | 0 |

|                                                                        |   |   |   |   |   |   |   |   |   |   |   |
|------------------------------------------------------------------------|---|---|---|---|---|---|---|---|---|---|---|
| <i>Planorbulinella larvata</i> (Parker & Jones, 1865)                  | 0 | 0 | 0 | 0 | 0 | 0 | 0 | 0 | 1 | 1 | 1 |
| <i>Planostegina operculinoides</i> (Hofker, 1927)                      | 0 | 0 | 0 | 1 | 0 | 0 | 0 | 0 | 1 | 0 | 0 |
| <i>Pseudorotalia indopacifica</i> (Thalmann, 1935)                     | 1 | 1 | 1 | 1 | 1 | 1 | 1 | 1 | 1 | 1 | 1 |
| <i>Pseudorotalia schroeteriana</i> (Parker & Jones in Carpenter, 1862) | 1 | 1 | 1 | 1 | 1 | 0 | 1 | 1 | 1 | 1 | 0 |
| <i>Rotalinoides gaimardii</i> (d'Orbigny in Fornasini, 1906)           | 0 | 0 | 0 | 0 | 1 | 1 | 1 | 1 | 1 | 1 | 0 |

**Supplementary Table S2.** The full dataset and the taxon averages of Oxygen and Carbon isotopes.

| Samples                               | Locality | Depths<br>(m) | $\delta^{13}\text{C}$ | std. | $\delta^{18}\text{O}$ | std. | Yield %<br>(as $\text{CaCO}_3$ ) | Taxon Averages        |                       |       |      |      |      |       |      |
|---------------------------------------|----------|---------------|-----------------------|------|-----------------------|------|----------------------------------|-----------------------|-----------------------|-------|------|------|------|-------|------|
|                                       |          |               | $\text{‰}$            |      | $\text{‰}$            |      |                                  | $\delta^{13}\text{C}$ | $\delta^{18}\text{O}$ |       |      |      |      |       |      |
|                                       |          |               | VPDB                  |      | VPDB                  |      |                                  | VPDB                  | VPDB                  |       |      |      |      |       |      |
| <b>Miliolina</b>                      |          |               |                       |      |                       |      |                                  |                       |                       |       |      |      |      |       |      |
| <i>Cycloforina granulocostata</i>     | MES1     | 14.5          | −0.73                 | 0.05 | −2.81                 | 0.09 | 94.2                             | −0.26                 | 0.66                  | −2.57 | 0.33 |      |      |       |      |
| <i>Cycloforina granulocostata</i>     | MES5     | 31            | 0.21                  | 0.03 | −2.34                 | 0.07 | 90.5                             |                       |                       |       |      |      |      |       |      |
| <i>Quinqueloculina granulocostata</i> | MES24    | 144           | 0.12                  | 0.02 | −0.21                 | 0.07 | 95.8                             |                       |                       |       |      |      |      |       |      |
| <i>Quinqueloculina granulocostata</i> | MES22    | 93            | 0.45                  | 0.02 | −0.34                 | 0.07 | 92.9                             |                       |                       |       |      |      |      |       |      |
| <i>Quinqueloculina granulocostata</i> | MES25    | 94            | −0.53                 | 0.03 | −0.66                 | 0.03 | 97.6                             |                       |                       |       |      |      |      |       |      |
| <i>Quinqueloculina granulocostata</i> | MES27    | 92            | 0.49                  | 0.05 | −0.74                 | 0.12 | 65.1                             | 0.13                  | 0.47                  | −0.49 | 0.25 |      |      |       |      |
| <i>Quinqueloculina parkeri</i>        | MES1     | 14.5          | 0.92                  | 0.05 | −2.13                 | 0.09 | 85.8                             | 0.94                  | 0.62                  | −2.05 | 0.27 |      |      |       |      |
| <i>Quinqueloculina parkeri</i>        | MES5     | 31            | 0.32                  | 0.07 | −1.74                 | 0.10 | 93.4                             |                       |                       |       |      |      |      |       |      |
| <i>Quinqueloculina parkeri</i>        | MES8     | 34            | 1.57                  | 0.06 | −2.27                 | 0.12 | 74.4                             |                       |                       |       |      |      |      |       |      |
| <b>Lagenina</b>                       |          |               |                       |      |                       |      |                                  |                       |                       |       |      |      |      |       |      |
| <i>Lenticulina echinata</i>           | MES27    | 92            | −0.10                 | 0.03 | −1.10                 | 0.06 | 97.2                             | 0.09                  | 0.33                  | −0.41 | 0.65 |      |      |       |      |
| <i>Lenticulina echinata</i>           | MES24    | 144           | −0.24                 | 0.02 | −0.11                 | 0.04 | 105.3                            |                       |                       |       |      |      |      |       |      |
| <i>Lenticulina echinata</i>           | MES25    | 94            | 0.51                  | 0.04 | −0.78                 | 0.08 | 85.5                             |                       |                       |       |      |      |      |       |      |
| <i>Lenticulina echinata</i>           | MES29    | 190           | 0.19                  | 0.03 | 0.35                  | 0.06 | 98.0                             |                       |                       |       |      |      |      |       |      |
| <i>Lenticulina vortex</i>             | MES27    | 92            | 0.49                  | 0.02 | −1.17                 | 0.06 | 96.7                             |                       |                       |       |      |      |      |       |      |
| <i>Lenticulina vortex</i>             | MES24    | 144           | −0.20                 | 0.03 | −1.48                 | 0.09 | 76.7                             | 0.29                  | 0.43                  | −1.20 | 0.26 |      |      |       |      |
| <i>Lenticulina vortex</i>             | MES25    | 94            | 0.59                  | 0.04 | −0.95                 | 0.09 | 92.1                             |                       |                       |       |      |      |      |       |      |
| <i>Dentalina vertebralis</i>          | MES5     | 31            | 0.11                  | 0.03 | −0.99                 | 0.06 | 99.3                             |                       |                       |       |      |      |      |       |      |
| <i>Dentalina vertebralis</i>          | MES17    | 84            | 0.41                  | 0.04 | −0.60                 | 0.08 | 93.1                             |                       |                       |       |      |      |      |       |      |
| <i>Dentalina vertebralis</i>          | MES22    | 93            | −0.09                 | 0.04 | −0.47                 | 0.06 | 102.1                            |                       |                       |       |      |      |      |       |      |
| <i>Dentalina vertebralis</i>          | MES24    | 144           | 0.42                  | 0.06 | 0.07                  | 0.10 | 92.4                             | 0.21                  | 0.19                  | −0.56 | 0.36 |      |      |       |      |
| <i>Dentalina vertebralis</i>          | MES25    | 94            | 0.23                  | 0.02 | −0.52                 | 0.07 | 97.1                             |                       |                       |       |      |      |      |       |      |
| <i>Dentalina vertebralis</i>          | MES27    | 92            | 0.18                  | 0.04 | −0.83                 | 0.06 | 98.7                             |                       |                       |       |      |      |      |       |      |
| <b>Rotaliina</b>                      |          |               |                       |      |                       |      |                                  |                       |                       |       |      |      |      |       |      |
| <i>Pseudorotalia indopacifica</i>     | MES5     | 31            | 0.29                  | 0.03 | −0.66                 | 0.09 | 83.5                             |                       |                       |       |      | 0.04 | 0.23 | −0.80 | 0.80 |
| <i>Pseudorotalia indopacifica</i>     | MES8     | 34            | −0.43                 | 0.06 | −2.36                 | 0.10 | 96.2                             |                       |                       |       |      |      |      |       |      |
| <i>Pseudorotalia indopacifica</i>     | MES15    | 68            | −0.08                 | 0.02 | −1.46                 | 0.06 | 102.7                            |                       |                       |       |      |      |      |       |      |
| <i>Pseudorotalia indopacifica</i>     | MES16    | 77            | 0.21                  | 0.03 | −1.25                 | 0.07 | 105.1                            |                       |                       |       |      |      |      |       |      |
| <i>Pseudorotalia indopacifica</i>     | MES17    | 84            | 0.09                  | 0.03 | −0.65                 | 0.07 | 93.5                             |                       |                       |       |      |      |      |       |      |
| <i>Pseudorotalia indopacifica</i>     | MES22    | 93            | 0.31                  | 0.02 | −0.33                 | 0.05 | 103.0                            |                       |                       |       |      |      |      |       |      |
| <i>Pseudorotalia indopacifica</i>     | MES24    | 144           | −0.24                 | 0.04 | −0.42                 | 0.05 | 93.8                             |                       |                       |       |      |      |      |       |      |
| <i>Pseudorotalia indopacifica</i>     | MES25    | 94            | 0.11                  | 0.02 | −0.93                 | 0.06 | 96.6                             |                       |                       |       |      |      |      |       |      |
| <i>Pseudorotalia indopacifica</i>     | MES29    | 190           | 0.02                  | 0.02 | 0.70                  | 0.06 | 106.0                            |                       |                       |       |      |      |      |       |      |
| <i>Pseudorotalia indopacifica</i>     | MES27    | 92            | 0.15                  | 0.02 | −0.64                 | 0.04 | 100.5                            |                       |                       |       |      |      |      |       |      |
| <i>Rotalinoides gaimardii</i>         | MES16    | 77            | 0.94                  | 0.06 | −1.22                 | 0.05 | 100.5                            |                       |                       |       |      |      |      |       |      |
| <i>Rotalinoides gaimardii</i>         | MES17    | 84            | 0.97                  | 0.05 | −0.94                 | 0.11 | 95.1                             |                       |                       |       |      |      |      |       |      |
| <i>Rotalinoides gaimardii</i>         | MES27    | 92            | 1.24                  | 0.03 | −1.18                 | 0.09 | 95.3                             |                       |                       |       |      |      |      |       |      |
| <i>Rotalinoides gaimardii</i>         | MES22    | 93            | 0.89                  | 0.03 | −1.34                 | 0.09 | 88.0                             |                       |                       |       |      |      |      |       |      |
| <i>Rotalinoides gaimardii</i>         | MES25    | 94            | 0.97                  | 0.06 | −1.63                 | 0.12 | 88.5                             |                       |                       |       |      |      |      |       |      |

|                                    |       |      |              |      |              |      |       |             |      |              |      |
|------------------------------------|-------|------|--------------|------|--------------|------|-------|-------------|------|--------------|------|
| <i>Rotalinoides gaimardii</i>      | MES24 | 144  | <b>1.10</b>  | 0.02 | <b>-0.63</b> | 0.06 | 82.7  | <b>1.02</b> | 0.13 | <b>-1.16</b> | 0.34 |
| <i>Pseudorotalia schroeteriana</i> | MES1  | 14.5 | <b>-1.18</b> | 0.04 | <b>-3.62</b> | 0.03 | 103.2 |             |      |              |      |
| <i>Pseudorotalia schroeteriana</i> | MES5  | 31   | <b>-0.33</b> | 0.06 | <b>-3.45</b> | 0.08 | 102.1 |             |      |              |      |
| <i>Pseudorotalia schroeteriana</i> | MES8  | 34   | <b>0.57</b>  | 0.02 | <b>-2.60</b> | 0.06 | 90.3  |             |      |              |      |
| <i>Pseudorotalia schroeteriana</i> | MES5  | 31   | <b>0.70</b>  | 0.03 | <b>-1.65</b> | 0.03 | 96.3  |             |      |              |      |
| <i>Pseudorotalia schroeteriana</i> | MES16 | 77   | <b>0.33</b>  | 0.03 | <b>-1.83</b> | 0.06 | 78.3  |             |      |              |      |
| <i>Pseudorotalia schroeteriana</i> | MES27 | 92   | <b>-0.27</b> | 0.02 | <b>-1.52</b> | 0.06 | 88.0  |             |      |              |      |
| <i>Pseudorotalia schroeteriana</i> | MES22 | 93   | <b>0.48</b>  | 0.03 | <b>-1.40</b> | 0.06 | 97.5  |             |      |              |      |
| <i>Pseudorotalia schroeteriana</i> | MES25 | 94   | <b>-0.20</b> | 0.02 | <b>-3.31</b> | 0.07 | 90.4  |             |      |              |      |
| <i>Pseudorotalia schroeteriana</i> | MES24 | 144  | <b>0.61</b>  | 0.04 | <b>-1.14</b> | 0.04 | 99.0  | <b>0.08</b> | 0.62 | <b>-2.28</b> | 0.97 |

**Supplementary Table S3.** Data of Oxygen and Carbon water isotopic composition.

| Site                 | Date           | Depth<br>(m) | T<br>(°C) | $\delta^{18}\text{O}$<br>‰, VSMOW | std. | $\delta^{13}\text{C}$<br>‰, VPDB | std. |
|----------------------|----------------|--------------|-----------|-----------------------------------|------|----------------------------------|------|
| <b>Dolphin Wreck</b> | 17 August 2022 | 24.4         | 29–30     | <b>-0.69</b>                      | 0.10 | <b>-0.67</b>                     | 0.07 |
| <b>Pelong Rock</b>   | 17 August 2022 | 5            | 29–30     | <b>-0.74</b>                      | 0.11 | <b>-0.45</b>                     | 0.05 |
| <b>Bolkiah Wreck</b> | 18 August 2022 | 23.5         | 30        | <b>-0.64</b>                      | 0.05 | <b>-0.25</b>                     | 0.03 |
| <b>OilRig 2</b>      | 18 August 2022 | 10           | 30        | <b>-0.50</b>                      | 0.08 | <b>-0.28</b>                     | 0.03 |
|                      |                |              | Av.       | <b>-0.64</b>                      |      | <b>-0.41</b>                     |      |
|                      |                |              | Std.      | <b>0.10</b>                       |      | <b>0.19</b>                      |      |
